# Supplementary material
Source: PubMed Central journal article supplement (PMC5127233)
Supplement: DC160954SupplementaryData.pdf [file DC160954SupplementaryData.pdf]

**Supplementary Figure S1. Data Source Diagram**

MeSH search terms of ((diabetes remission bariatric surgery) OR diabetes remission RYGB) OR diabetes remission Roux-en-Y; supplemented by Cochrane review with search term 'bariatric', and papers cited in a review or meta-analyses, yielded 625 papers. Further restriction to human subjects, English language, and excluding reviews and other summarizations yielded 284 papers. Excluding 215 papers based on titles (151 studying outcomes other than remission, 25 position papers, protocols, letters, or meta-analyses, 30 studying surgical treatments other than RYGB, and 5 of adolescents or sample sizes less than 100), abstracts were examined for 69 (28 eight of which were excluded for having sample sizes under 100). Full text articles were reviewed for 33 papers, of which 6 had diabetic sample sizes under 100, 9 did not measure our outcome of interest, 5 did not report usable counts, and 3 were duplicate studies.

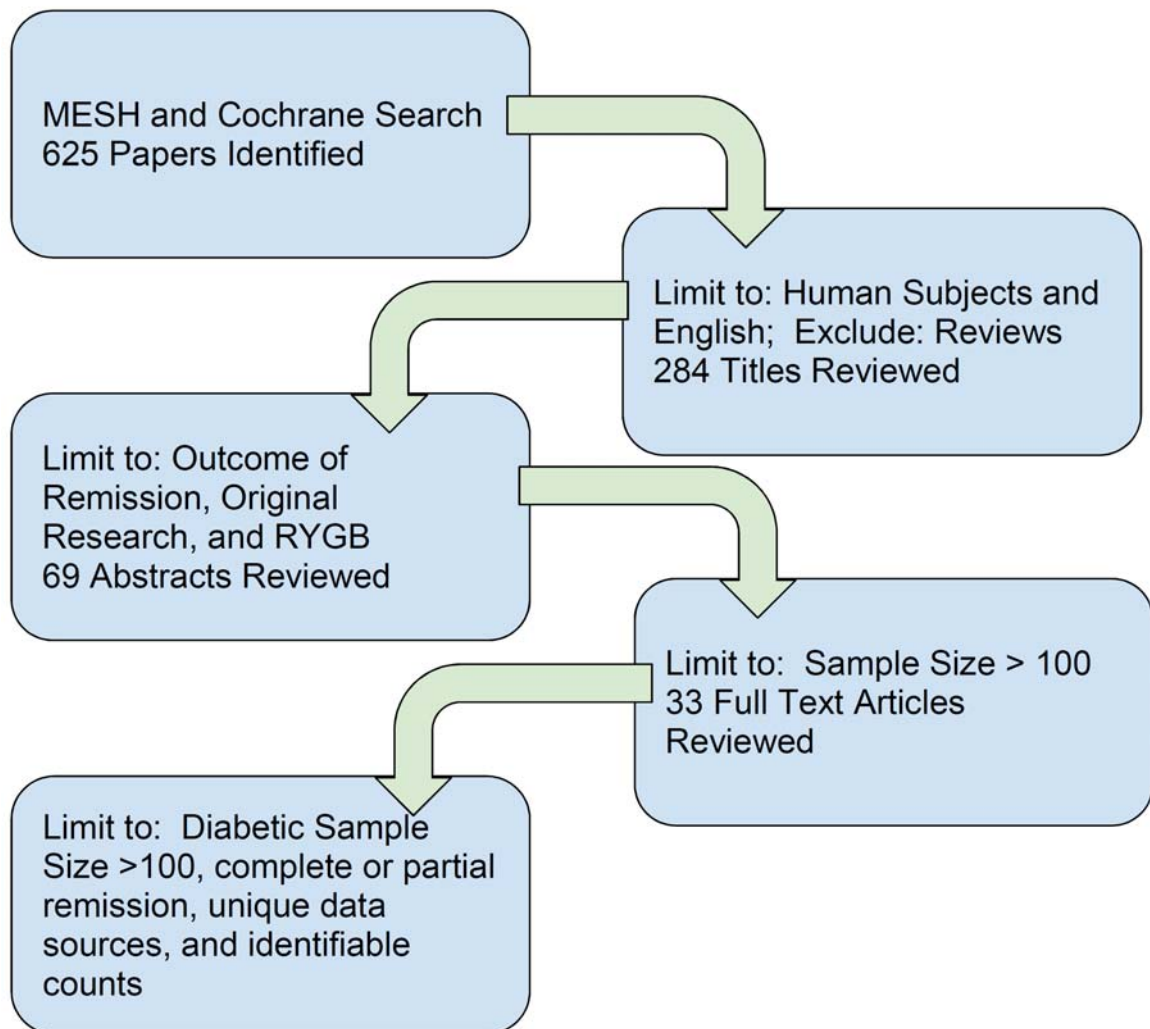

SUPPLEMENTARY DATA

**Supplementary Figure S2.** Reduction in Cumulative Complete Remission Rates when adjusting for Attrition, but not Considering Duration of Study.

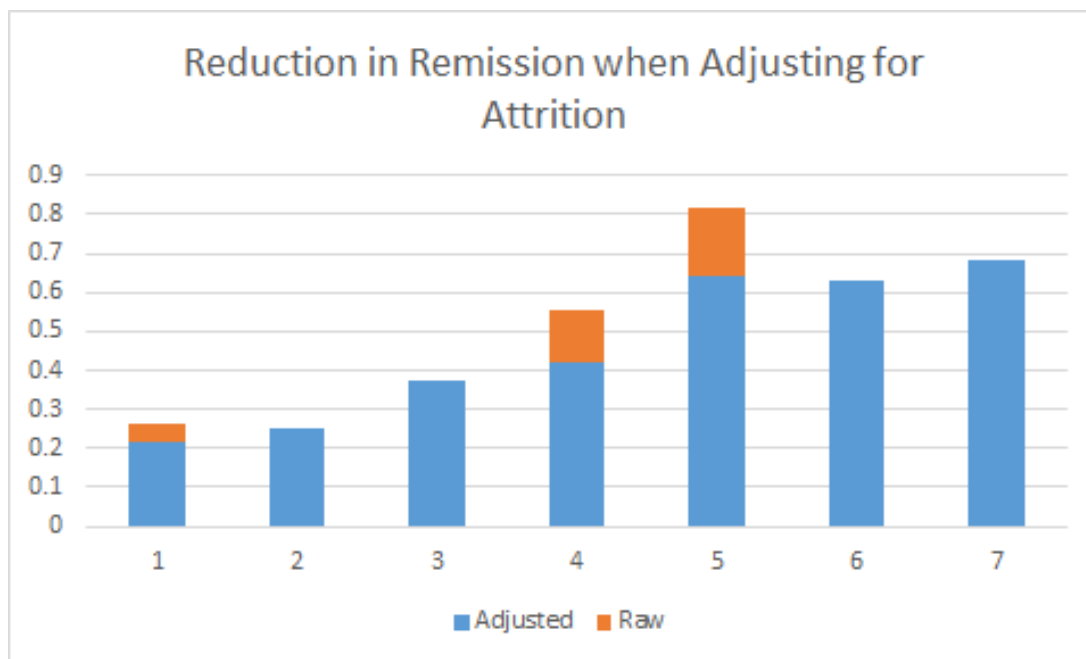

SUPPLEMENTARY DATA

**Supplementary Figure S3.** Plot of Unadjusted Cumulative Remission rates versus Adjusted Cumulative Rates and R-square values for Corresponding Log-scale Models.

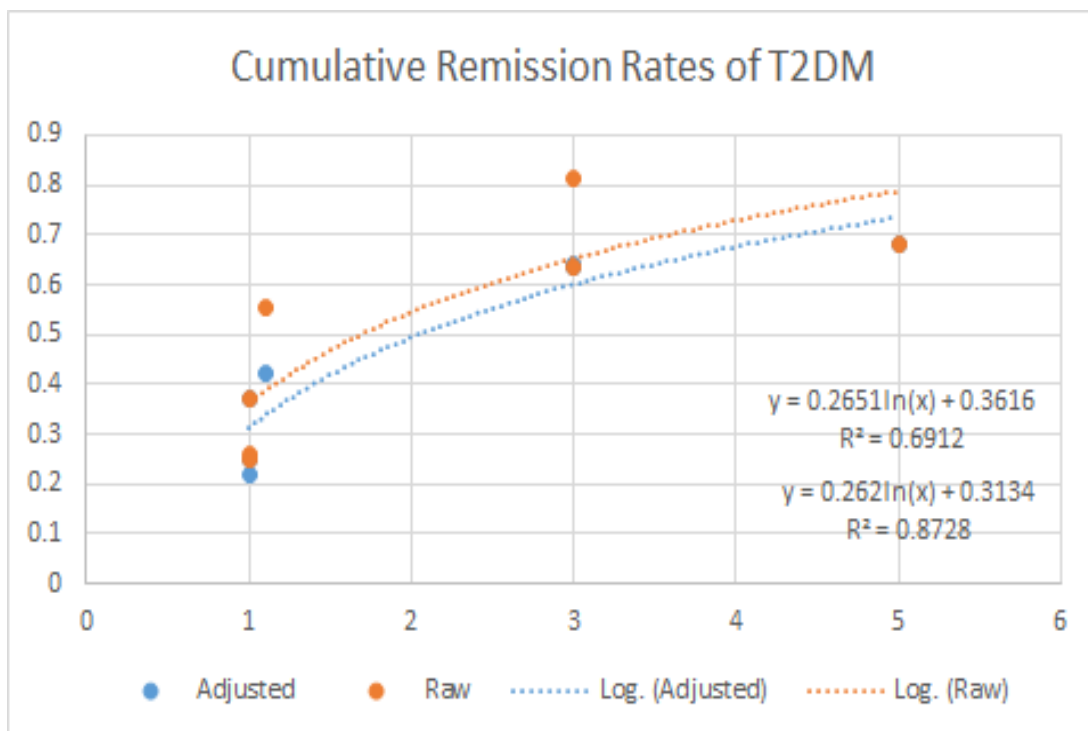

SUPPLEMENTARY DATA

**Supplementary Table S1.** Summary of Published Remission Rates for Partial Remission\* of Diabetes following Roux-en-Y Gastric Bypass

|                                       | Follow up (yrs) | N Initial         | N (%) retained | N remiss | reported rate (method) † | Data Source  | ExC Adjusted rate ‡ |
|---------------------------------------|-----------------|-------------------|----------------|----------|--------------------------|--------------|---------------------|
| <b>Reporting Cumulative Remission</b> |                 |                   |                |          |                          |              |                     |
| Arterburn, 2013<br>Obes surg          | 1               | 4434              |                | 1795     | 47%<br>(KM)              | EMR§         | 47%<br>(45.6,48.8)  |
| Still, 2014<br>Lancet                 | 2               | 690               |                |          | 58%<br>(KM)              | EMR          | 58%<br>(55,62)      |
| Arterburn, 2013<br>Obes surg          | 3               | 4434              |                | 2543     | 73%<br>(KM)              | EMR          | 73%<br>(70.9,74.1)  |
| Still, 2014<br>Lancet                 | 3               | 690               |                |          | 65%<br>(KM)              | EMR          | 65%<br>(61,69)      |
| Still, 2014<br>Lancet                 | 4               | 690               |                |          | 66%<br>(KM)              | EMR          | 66%<br>(62,70)      |
| Still, 2014<br>Lancet                 | 5               | 690               |                |          | 68%<br>(KM)              | EMR          | 68%<br>(64,73)      |
| Arterburn, 2013<br>Obes surg          | 5               | 4434              |                | 2617     | 77%<br>(KM)              | EMR          | 77%<br>(75.3, 78.6) |
| Obeid, 2015<br>Surg Obes Rel          | 10              | 328               | 134            |          | 58%<br>(KM)              | EMR + clinic | 58%<br>NR           |
| <b>Point Prevalent</b>                |                 |                   |                |          |                          |              |                     |
| Guiliford, 2016<br>Ob Surg            | 0-1             | 449               | 449<br>(100%)  | 112      | 25%<br>(KM)              | EMR          | 25%<br>NR           |
| Brethauer, 2013<br>Ann Surg           | 1-2             | 221 <sup>  </sup> | 162<br>(73%)   | 115      | 71%<br>(AC)              | clinic       | 52%<br>(45.4, 58.6) |
| Guiliford, 2016<br>Ob Surg            | 1-2             | 449               | 361<br>(80%)   | 122      | 33.8%<br>(KM)            | EMR          | 34%<br>NR           |

SUPPLEMENTARY DATA

|                             |     |                  |              |     |             |                       |                     |
|-----------------------------|-----|------------------|--------------|-----|-------------|-----------------------|---------------------|
| Guiliford, 2016<br>Ob Surg  | 2-3 | 449              | 249<br>(55%) | 70  | 28%<br>(KM) | EMR                   | 28%<br>NR           |
| Courcoulas,<br>2015 Surg Ob | 3   | 583              | 320          | 216 | 68%<br>(AC) | multi-site<br>clinics | 37%<br>(33.1, 40.9) |
| Brethauer, 2013<br>Ann Surg | 3-5 | 221 <sup>^</sup> | 162<br>(73%) | 99  | 61%<br>(AC) | clinic<br>f/u         | 45%<br>(38.4, 51.6) |

\* Partial remission of diabetes as defined by HbA1c  $\leq$  6.5 and off all diabetic medications

† AC: available-case KM: Kaplan-Meier analyses

‡ Extreme-case Imputed remission rates for available-case analyses, other methods not adjusted

§EMR: Electronic medical record system.

|| Estimated sample size. See Supplement Table S2 for detail.

SUPPLEMENTARY DATA

**Supplementary Figure S4.** Cumulative Partial Remission Rates following RYGB as a function of time, using estimates that account for dropouts either by Kaplan-Meier analysis or worst-case imputation.

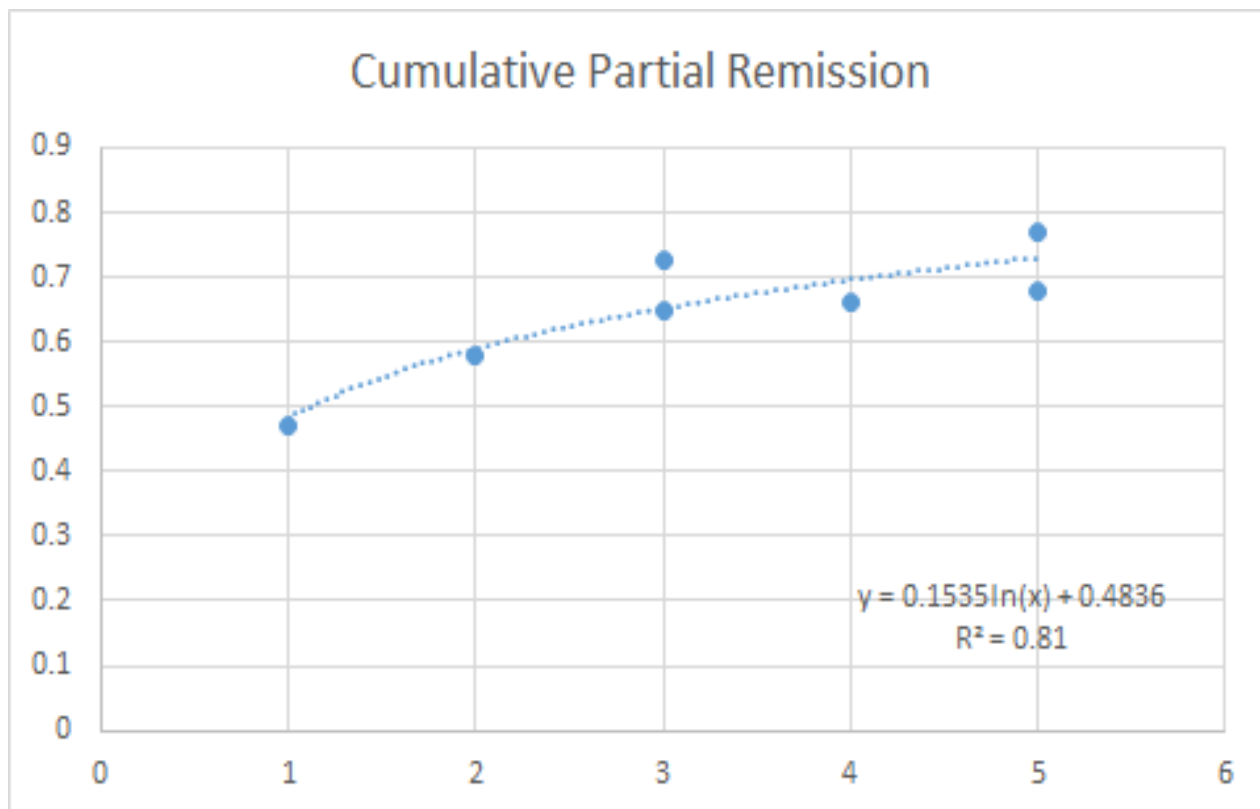

SUPPLEMENTARY DATA

**Supplementary Figure S5.** Plot of Prevalent Partial Remission for Four clinical Studies, and Linear Models for Each Study Providing Estimates at More than One Time Point.

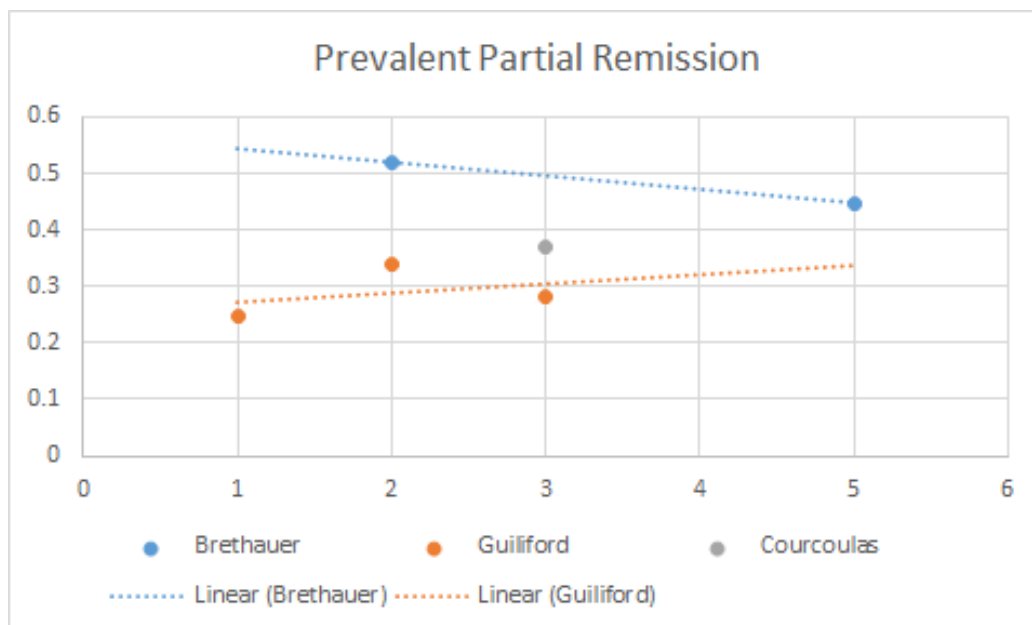

SUPPLEMENTARY DATA

**Supplementary Table S2.** Estimations Made for Count Calculations

|                                                |                                                                                                             |                                                                                                                                                                                                                                 |
|------------------------------------------------|-------------------------------------------------------------------------------------------------------------|---------------------------------------------------------------------------------------------------------------------------------------------------------------------------------------------------------------------------------|
| Yska et al, (2015)                             | Did not report dropout specific to the RYGB arm, but did report dropout for the total sample                | We report the overall 54% 1-year retention rate found in Table 2 of their published supplemental materials                                                                                                                      |
| Brethauer et al (2013)                         | Did not report dropout specific to the RYGB arm, but did report dropout for the total sample                | We applied the 27% total dropout rate to the RYGB subsample to estimate the initial sample size                                                                                                                                 |
| Schauer et al, (2003)                          | Reported their initial sample size combining patients with both diabetes and impaired fasting glucose (IFG) | We applied the 7% proportion of IFG seen in the complete-case sample. A more conservative estimate, removing only the 14 known people with IFG, yields an initial sample size of 225 and an attrition-adjusted estimate of 64%. |
| Arterburn et al, (2013) and Yska et al, (2015) | Did not report number of events for complete remission                                                      | We applied the Kaplan-meier rate to the initial sample size.                                                                                                                                                                    |
